# Supplementary material
Source: Research Square preprint supplement (doi:10.21203/rs.3.rs-10299618/v1)
Supplement: Supplementary file 1 [file 06b72910198dc3c73334a08f.docx]

**Supplementary Information**

The online version contains supplementary material. **Online Resource 1** provides additional implementation details, complete numerical settings, threshold calibration procedures for the Jensen–Shannon baseline methods, sensitivity analyses for the adaptive-hazard coefficient, additional Monte Carlo summaries, and preprocessing details for the arXiv cs.CL application.

**Online Resource 1**

**Supplementary Material for**

**Adaptive-Hazard Bayesian Online Change-Point Detection for Text Streams: A Dirichlet-Multinomial Formulation**

**S1 Complete numerical settings**

This section provides additional numerical details for the experiments reported in Sect. 4. The baseline design used independent streams per scenario, stream length , vocabulary size , and latent topics. Each topic distribution was generated from a structured Dirichlet distribution with topic-specific and background vocabulary components. The document-level word distribution was then drawn from a Dirichlet distribution centered on the active topic distribution, and the observed document was generated as a multinomial count vector.

The adaptive-hazard filter used , , , , rolling-window size , and pruning threshold . The intercept was calibrated so that the adaptive hazard coincided with the baseline constant hazard under the constant-hazard restriction. This calibration ensured that the difference between DM-BOCPD-AH and DM-BOCPD-CH was attributable to the feature-dependent hazard response rather than to a different baseline reset probability.

**S2 Detection rule**

The Bayesian filters produce posterior run-length distributions at each time point. To convert the posterior filtering output into an operational detection time, a candidate boundary was declared when the maximum a posteriori run length fell below a reset threshold after the filter had previously accumulated a minimum run length. A minimum spacing rule was imposed between consecutive detections to avoid repeated alarms for the same transition. The same rule was applied to DM-BOCPD-AH and DM-BOCPD-CH.

For abrupt-shift, sparse-document, and noisy-vocabulary scenarios, the reference boundary was . For gradual and weak lexical-drift scenarios, the midpoint was used as the reference boundary. Detections within the gradual transition interval were treated as valid early detections. Detections before the start of the transition window were classified as false alarms. In the no-change scenario, all detections were classified as false alarms.

**S3 Threshold calibration for Jensen–Shannon baselines**

The JS-CUSUM and JS-PH baselines were applied directly to the online Jensen–Shannon divergence sequence. Their thresholds were calibrated using stationary streams so that false alarm behavior was determined by the numerical design rather than by arbitrary manual tuning. JS-PELT was used as an offline comparator by applying penalized segmentation to the full Jensen–Shannon divergence sequence.

This calibration strategy allowed a fair comparison between Bayesian run-length filtering and direct monitoring of the same scalar drift feature. The Jensen–Shannon baselines do not maintain a posterior distribution over run length, so posterior entropy, maximum posterior mass, and retained-state summaries were reported only for DM-BOCPD-AH and DM-BOCPD-CH.

**S4 Sensitivity analysis for the adaptive-hazard coefficient**

A sensitivity analysis was conducted by varying the adaptive-hazard coefficient . The value corresponds to the constant-hazard restriction, while positive values allow the reset probability to increase with online lexical-distributional drift. The sensitivity results showed the expected responsiveness–specificity trade-off. Larger values increased sensitivity under gradual and weak lexical drift, but they also increased false alarm rates under sparse short-document conditions.

The final configuration used because it provided a stable compromise across scenarios. It improved responsiveness under gradual and weak drift while avoiding the stronger false alarm inflation observed at larger sensitivity values. Thus, should be viewed as a calibration parameter whose appropriate value depends on document length, lexical sparsity, and the operational cost of false alarms.

**S5 Additional Monte Carlo summaries**

Monte Carlo uncertainty was summarized using standard errors for proportions and means. For a proportion , the Monte Carlo standard error was computed as

For a mean , the Monte Carlo standard error was computed as

where denotes the sample standard deviation over the contributing streams and denotes the number of streams contributing to the mean. These quantities were used to assess the stability of the numerical summaries reported in the main article.

**S6 Posterior pruning and retained states**

Posterior pruning was applied after each filtering update by retaining run-length states whose posterior probability exceeded . The reset state and the maximum a posteriori run-length state were always retained. This rule prevented the filter from discarding either a newly reset segment or the most probable continuing segment.

Across the numerical experiments, the retained state space remained small. The adaptive-hazard filter retained fewer than 4.4 run-length states on average across all scenarios, with a maximum retained-state count of 15. These summaries indicate that probability pruning substantially reduced the computational burden relative to the unpruned BOCPD recursion, whose number of run-length states grows linearly with time.

**S7 arXiv cs.CL preprocessing**

The real-data application used publicly available arXiv metadata from the cs.CL category. Titles and abstracts from January 2023 to December 2024 were aggregated into weekly text units. Standard text preprocessing was applied before constructing weekly word-count vectors. After vocabulary truncation, the final stream contained weekly periods, 5262 documents, and 1000 retained terms.

The arXiv application was designed as a stability check on a naturally varying text stream rather than as an event-discovery benchmark with labelled change points. Both DM-BOCPD-AH and DM-BOCPD-CH were applied to the same weekly count sequence. The adaptive hazard responded to local lexical variation, but neither filter selected a candidate boundary under the MAP run-length rule.

**S8 Reproducibility**

All numerical experiments were implemented in R. The implementation includes scripts for generating synthetic text streams, applying DM-BOCPD-AH and DM-BOCPD-CH, calibrating Jensen–Shannon baseline methods, computing detection summaries, producing posterior uncertainty summaries, and generating figures. The arXiv application scripts include metadata retrieval, weekly aggregation, preprocessing, vocabulary construction, filtering, and figure generation.

The reproducibility package contains the following components:

R scripts for synthetic stream generation
R scripts for DM-BOCPD-AH and DM-BOCPD-CH filtering
R scripts for JS-CUSUM, JS-PH, and JS-PELT baselines
CSV files containing numerical summaries
CSV files containing real-data application summaries
Figure files used in the manuscript
Session information and package versions

The repository link will be inserted upon submission or made available as an anonymized review link, depending on the journal’s peer-review requirements.
